# Supplementary material for: Sliding of a 43S ribosomal complex from the recognized AUG codon triggered by a delay in eIF2-bound GTP hydrolysis
Source: PubMed Central journal article supplement — Nucleic Acids Res. 2015 Dec 29;44(4):1882–93. doi: 10.1093/nar/gkv1514 (PMC4770231; doi:10.1093/nar/gkv1514), 2015-12-29
Supplement: supp_gkv1514_nar-02423-y-2015-File008.pdf [file supp_gkv1514_nar-02423-y-2015-File008.pdf]

# Sliding of a 43S ribosomal complex from the recognized AUG codon triggered by a delay in eIF2-bound GTP hydrolysis

Ilya M. Terenin, Kseniya A. Akulich, Dmitry E. Andreev, Sofya A. Polyanskaya, Ivan N. Shatsky and Sergey E. Dmitriev

## SUPPLEMENTARY DATA

10<sup>th</sup>      11<sup>th</sup>      12<sup>th</sup>

**EMCV <IRES>** -CCGAACCACGGGGACGTGGTTTTTCCTTTGAAAAACACGATGATAATATGGCCACAACCATGGAACAAGAGACTTGCGCGCACTCTCTCACTTTTTGAGGAATGCCAAAATGCTCTGCTCTAC

**ΔE012**                    GGGAAATTCGTGGTTTTTCCTTTGAAAAACACGATGATAATATGGCCACAACCATGGAACAAGAGACTTGCGCGCACTCTCTCACTTTTTGAGGAATGCCAAAATGCTCTGCTCTAC

**ΔE12**                    GGGAAATTCGTGGTTTTTCCTTTGAAAAACACGtaGATAATATGGCCACAACCATGGAACAAGAGACTTGCGCGCACTCTCTCACTTTTTGAGGAATGCCAAAATGCTCTGCTCTAC

**ΔE1**                     GGGAAATTCGTGGTTTTTCCTTTGAAAAACACGtaGATAATATGGCCACAACCtaGGAACAAGAGACTTGCGCGCACTCTCTCACTTTTTGAGGAATGCCAAAATGCTCTGCTCTAC

**ΔE2**                     GGGAAATTCGTGGTTTTTCCTTTGAAAAACACGtaGATAATtaGGCCACAACCATGGAACAAGAGACTTGCGCGCACTCTCTCACTTTTTGAGGAATGCCAAAATGCTCTGCTCTAC

**ΔE**                      GGGAAATTCGTGGTTTTTCCTTTGAAAAACACGtaGATAATtaGGCCACAACCtaGGAACAAGAGACTTGCGCGCACTCTCTCACTTTTTGAGGAATGCCAAAATGCTCTGCTCTAC

**ΔE02**                    GGGAAATTCGTGGTTTTTCCTTTGAAAAACACGATGATAATtaGGCCACAACCATGGAACAAGAGACTTGCGCGCACTCTCTCACTTTTTGAGGAATGCCAAAATGCTCTGCTCTAC

**ΔE112**    GGGAAATTCGTGGTTTTTCCTTTGAAAAACACGtaGataatatggccgATAATATGGCCACAACCATGGAACAAGAGACTTGCGCGCACTCTCTCACTTTTTGAGGAATGCCAAAATGCTCTGCTCTAC

**ΔE121**    GGGAAATTCGTGGTTTTTCCTTTGAAAAACACGtaGATAATATGGCCACAACCATGGAgataatatggccACAACCACGGAACGCGCACTCTCTCACTTTTTGAGGAATGCCAAAATGCTCTGCTCTAC

**ΔE122**    GGGAAATTCGTGGTTTTTCCTTTGAAAAACACGtaGATAATATGGCCACAACCATGGAaacaaccatggAACAAGAGACTTGCGCGCACTCTCTCACTTTTTGAGGAATGCCAAAATGCTCTGCTCTAC

**ΔE1del2**                GGGAAATTCGTGGTTTTTCCTTTGAAAAACACGtaGATAATATGG-----CCATGGAACAAGAGACTTGCGCGCACTCTCTCACTTTTTGAGGAATGCCAAAATGCTCTGCTCTAC

**ΔE1ins2**    GGGAAATTCGTGGTTTTTCCTTTGAAAAACACGtaGATAATATGGCCCaaccgcccacAACCATGGAACAAGAGACTTGCGCGCACTCTCTCACTTTTTGAGGAATGCCAAAATGCTCTGCTCTAC

**ΔE12UMBRA**            GGGAAATTCGTGGTTTTTCCTTTGAAAAACACGtaGATAATATGGCCatCAACCATGGAACAATCTTCGCAAGTGGCAAAGCTGCAACTCAGGGGGAGCTCCTCGAAGCTCTGTAC

**Figure S1.** Nucleotide sequences of ΔE012 plasmid and its derivatives. Only the fragments are shown that correspond to RNA transcripts (from the 5' end to the toe-printing primer annealing site, which is double-underlined). The EMCV coding region (with all extensions or modifications) is in **bold**. ATG codons within the initiation region are underlined. Nucleotides absent from the original ΔE012 sequence are shown in lower case letters. In ΔE12UMBRA, the umbravirus ORF3/4 region is outlined. Note that in the latter case “AUG11” and “AUG12” are in different reading frames due to additional “T” insertion between them.

**GL3-Fluc** 64 nt GGGAGCTTATCGATACCGTCGACCTCGAATCACTAGTCAGCTGGAATTCGTTGGTAAAGCCACC·····**ATGGAAGACGCCAAAAACATAAAG...**

**1uORF-Fluc1** 73 nt GGCTAGGCTTGGCATTCCGGTAGGC**ATGGCATTCCGGTAC****TGA**ATTGATCTGGAATTCGTTGGTAAAGCCACC·····**ATGGAAGACGCCAAAAACATAAAG...**

**1uAUG-Fluc1** 81 nt GGGAGCTTATCGATACCGTCGACCTCGAATCACTAGTCAGCTGGAATTCGTTGGTAAAGCCACC**ATGCCATCATCATCATC****ATGGAAGACGCCAAAAACATAAAG...**

**CDK4** 146 nt GGTGTGTCT**ATG**GTTCGGGCCCTCTGCGTCCAGCTGCTCCGGACCGAGCTCGGGTGT**ATC**GGGCCG**TAG**GAACCGGCTCCGGGGCCCGGATAACGGGCCGCCCCACAGCACCCCGGGCTGGCG**TGA**GGGTCTCCCTTGATCTGAGAA**TG**GCTAAGCTT**GACGCCAAAAACATAAAG...**

**CFTR** 134 nt GGAATTGGAAGCAA**ATG**CACATCACAGCAGGTACAGAGAAAAAGGTTGAGCGGCAGGCCACCCAGAG**TAG**TAGGTCTTTGGCATTAGGAGCTTGAGCCAGACGGCCCTAGCAGGGACCCAGCGCCCGAGAGACC**ATGAAGCTTGACG**CCAAAAACATAAAAG...

**MDM2** 307 nt GGTAGGGGGCGCGCACCGAGGCACCGCGGCGAGCTTGGCTGCTTCTGGGGCCTGTGTGGCCCTGTGTGTTCGGAAAG**ATG**GAGCAAGAAGCCGAGCCCGAGGGGGCGGCCGACCCCTC**TGA**CCGAGATCCTGCTGCTTTCGCAGCCA  
GGAGCACCGTCCCTCCCGGATTAGTGCCTACGAGCGCCAGTGCCTGGCCCGGAGAGTGGA**ATG**ATCCCCGAGGCCAGGGCGTCTGTCTCCGCGGCCCC**TGA**AGGAAACTGGGGAGTCTTGAGGGACCCCGACTCCAAGC  
CGGAAAACCCCG**ATG**GTGAGGAGCAGGCAATGTGCAATACCAACATGTCTA**AGCTTGACGCCAAAAACATAAAG...**

**PNRC2** 414 nt GGGCTGCCGACTCCATTTTGTTCGGTAGAGGCAGAAGGAGAAGGTCGGGTTGTAGAAGCTGGGGTGGCCGGCAGCTCGCTCATCGGTGTTCTGTGGGCTTGTTCGGTCCGTGCCTCGTCTCTCCCTGGAAAGGGAGGGAGGCTTCGACG  
TCGAGAGGGAGCCGCTGCCGCGTTAGTTCGAGCTTGAAGTCACTAGGACTTCTCTCAAACCTGTGTGCTGAGGAGACTCAG**ATG**TTGGCCTCAGCTCCTAGGCTGAATCAGCAGATCGGCC**ATG**AAAACCTCTGTATTGAGACA  
AAGGAAGGGATCTGTCTAGAAAGCAACACTTGTATCTTGGGCTTGGCAGCAAGGAAGAGGACAGGTAGTGGAGATCTGCAATCTGAAAAGCAGACTGAAAGG**TGA**CAAAGAAGCTGACC**ATGGAAGACGCCAAAAACATAAAG...**

**eIF2D** 123 nt GCTTTTTCGCGCCGGGCCCCAGC**ATGG**CTGCCCCACGGCTGAGGGCCTGGCAGCTGCTGCGCCCTCGCTTTCT**TGA**CATTCCCTGGCTTCTGTGCTCTCTTCCCCAGGCCACCCAGCAGAC**ATG**TTTGCCAAGGCCTTTCGGGTC  
AAGTCCAACACGGCCATCAAGCTGGCCACG**GAAGACGCCAAAAACATAAAG...**

**ATF4** 285 nt GGGTTTCTACTTTGCCCGCCACAG**ATGTAG**TTTTCTCTGCGCGTGTGCGTTTTCCCTCCTCCCCGCCCTCAGGGTCCACGGCCACC**ATG**GCGTAT**TAG**GGGCAGCAGTGCCTGCGGCAGCATTGGCCTTTGCAGCGGCGGCAGCA  
GCACCAGGCTCTGCAGCGGAACCCCGCGGCTTAAGCC**ATG**GCGCTTCTCAGGCATTCAGCAGCAGCGTTGCTGTAACCGACAAAAGACACCTTCGAATTAAGCACATTCTCGATTCCAGCAAAGCACCGCAACC**ATGGAAGAC**  
**GCCAAAAACATAAAG...**

**UCP2** 383 nt GGGCACTGCGAAGCCCAGCTGCGCGCGCCTTGGGATTGACTGTCCACGCTCGCCCGGCTCGTCCGACGCGCCCTCCGCCAGCCGACAGACACAGCCGACGCACTGCCGTGTTCTCCCTGCGGCTCGGACACATAGT**ATG**ACCATTA  
GGTGTTCGCTCTCCACCCATTTTCTA**ATG**GAAAACCAAGGGGATCGGGCC**ATG**ATAGCCACTGGCAGCTTTGAAGAACGGGACACCTTTAGAGAAGCT**TGA**TCTTGGAGGCTCACCGTGAGACCTTACAAAGCCGGATTCCGGCAG  
AGTTCTCTATCTCGTCTTGTGCTGATTAAGGTTGCCCTGTCTCCAGTTTTTCTCCATCTCTCTGGGACGTAGCAGGAAATCAGCAC**ATGGAAGACGCCAAAAACATAAAG...**

**UCP2mut** 383 nt GGGCACTGCGAAGCCCAGCTGCGCGCGCCTTGGGATTGACTGTCCACGCTCGCCCGGCTCGTCCGACGCGCCCTCCGCCAGCCGACAGACACAGCCGACGCACTGCCGTGTTCTCCCTGCGGCTCGGACACATAGTAgGACCATTA  
GGTGTTCGCTCTCCACCCATTTTCTAgGAAAACCAAGGGGATCGGGCCAgGATAGCCACTGGCAGCTTTGAAGAACGGGACACCTTTAGAGAAGCT**TGAT**TCTTGGAGGCTCACCGTGAGACCTTACAAAGCCGGATTCCGGCAG  
AGTTCTCTATCTCGTCTTGTGCTGATTAAGGTTGCCCTGTCTCCAGTTTTTCTCCATCTCTCTGGGACGTAGCAGGAAATCAGCAC**ATGGAAGACGCCAAAAACATAAAG...**

**(CA)uORF-Fluc** 37 nt GGAACAACAACAACAACAAA**ATG**ACACAACACAC**TGATGGAAGACGCCAAAAACATAAAG...**

**(CA)-Fluc** 37 nt GGAACAACAACAACAACAAAgtACACAACACACTG**ATGGAAGACGCCAAAAACATAAAG...**

**Figure S2.** cDNAs of reporter mRNAs used for the *in vitro* translation assay. Artificial and reporter sequences are *italized*, CDSs are shown in **bold**, uORFs are **shadowed**, Firefly luciferase sequence is in **yellow**, start sites are shown in **green**, the corresponding stop codons are in **red**. The 5' UTR lengths are indicated.

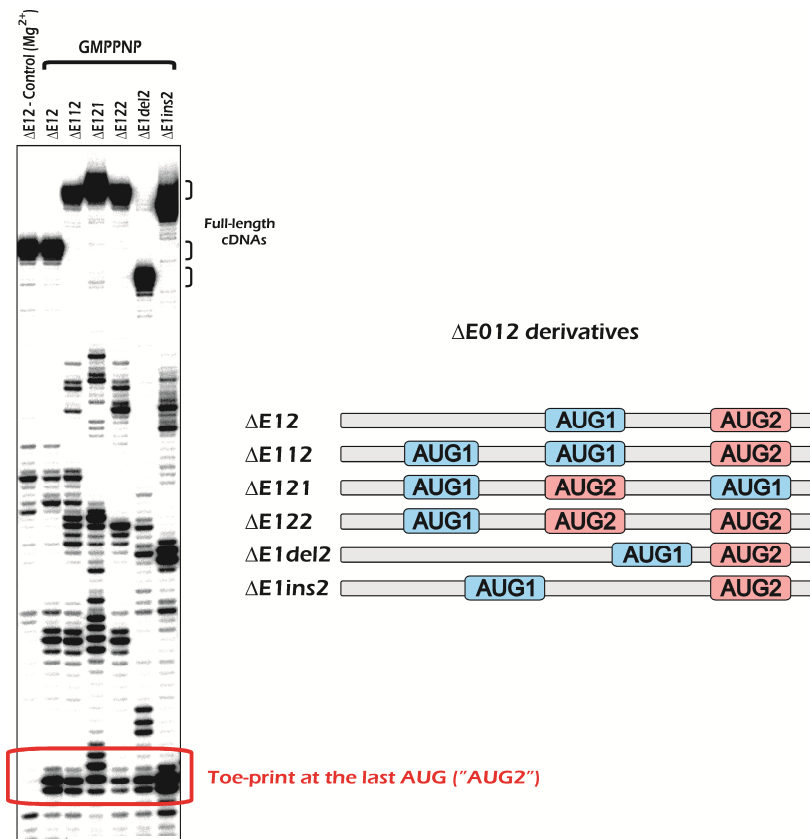

**Figure S3.** Toe-printing analysis of 48S complexes assembled in RRL on mRNAs with different combinations of ΔE012-derived initiating regions. m<sup>7</sup>G-capped mRNAs were incubated in RRL with 2 mM GMPPNP·Mg for 10 min. The 48S complexes are detected at the last AUG codons of the ΔE012 mRNA derivatives irrespective of a number of preceding AUG codons. Schematic representation of the initiation regions is shown on the right.

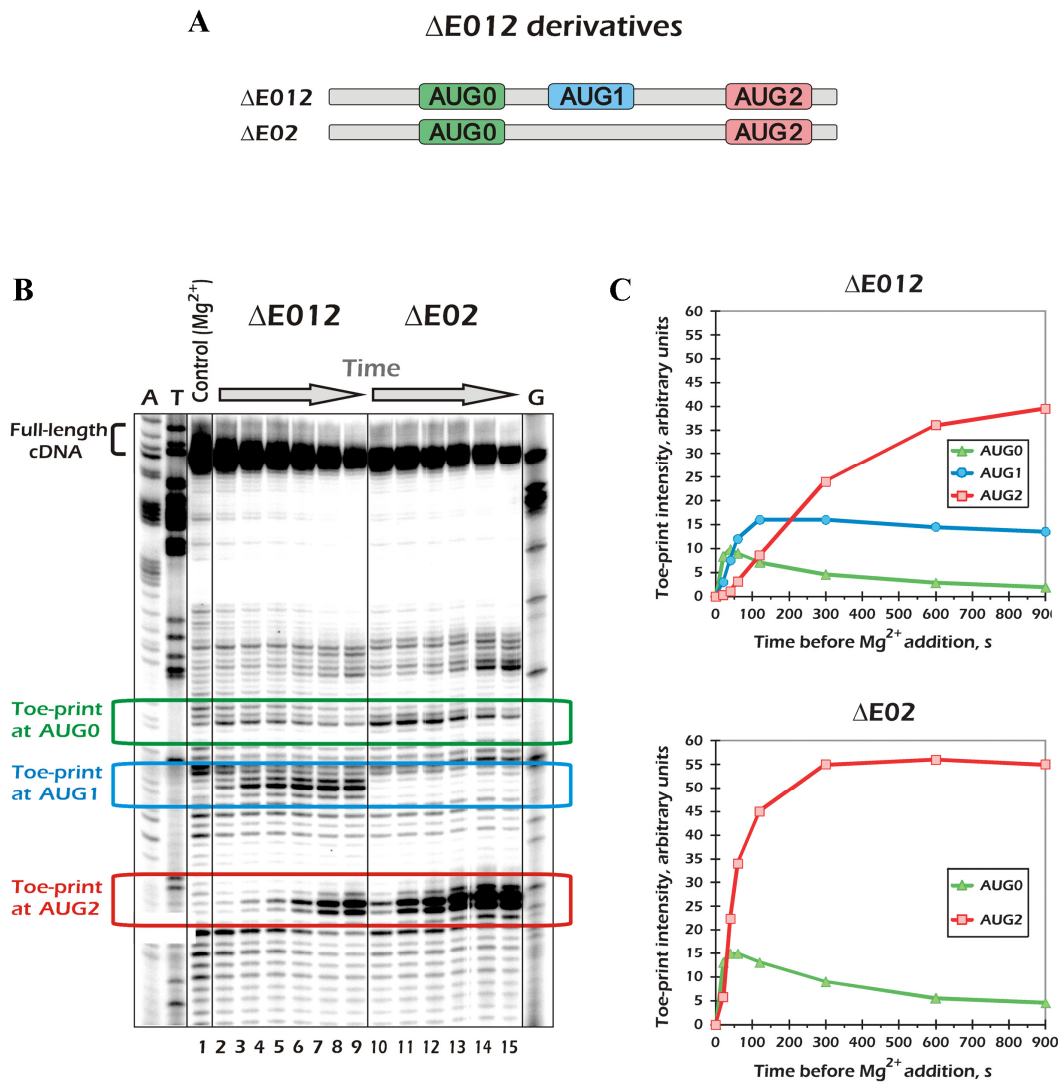

**Figure S4.** Time course of 48S formation at AUG codons of the  $\Delta$ E012 and  $\Delta$ E02 mRNAs assayed by kinetic toe-printing technique. (A) Schematic representation of the mRNA's initiation regions. (B) Sequencing gel with results of the kinetic toe-printing assay. (C) Quantification of toe-print signals corresponding to the 48S complexes at the three AUG codons. The values were normalized to the overall signal densities in the corresponding lanes.

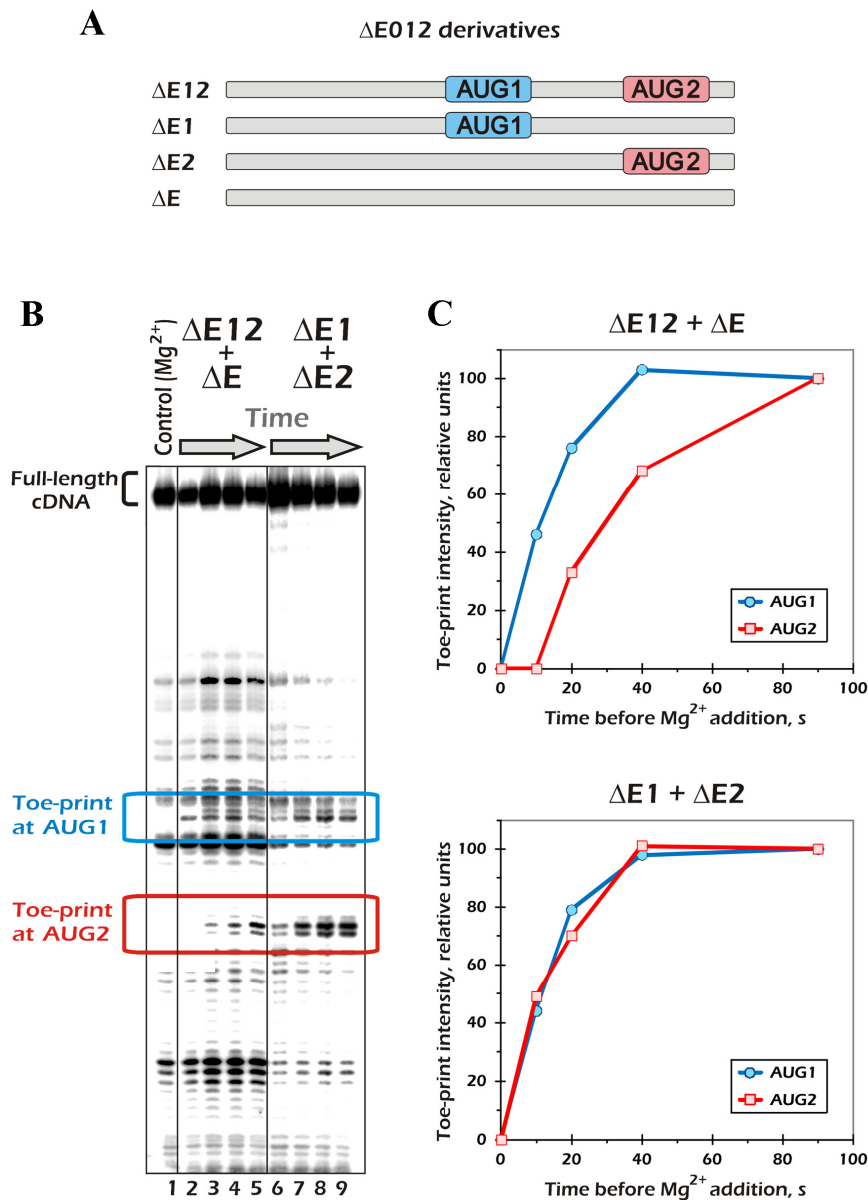

**Figure S5.** Time course of 48S formation at two AUG codons of different  $\Delta E012$  mRNA derivatives assayed by kinetic toe-printing technique. (A) Schematic representation of initiation regions of the four  $\Delta E012$  mRNA derivatives used in this experiment. Note that  $\Delta E$  mRNA does not possess any AUG codon in this region. (B) Sequencing gel with results of the kinetic toe-printing assay. The indicated equimolar mRNA mixtures were incubated in RRL in the presence of GMPPNP for different times (lanes 2 and 6 – 10 s, 3 and 7 – 20 s, 4 and 8 – 40 s, 5 and 9 – 90 s), then the reaction was stopped by elevating the  $Mg^{2+}$  concentration. The  $\Delta E$  mRNA was added as a ballast to ensure the equal molar “concentration” of AUG1 and AUG2 in all cases. Positions of the toe-prints are indicated. (C) Quantification of toe-print signals corresponding to the 48S complexes at the AUG codons. The values were normalized to the overall signal densities in the corresponding lanes and then expressed in percents of the maximum values for each complex.

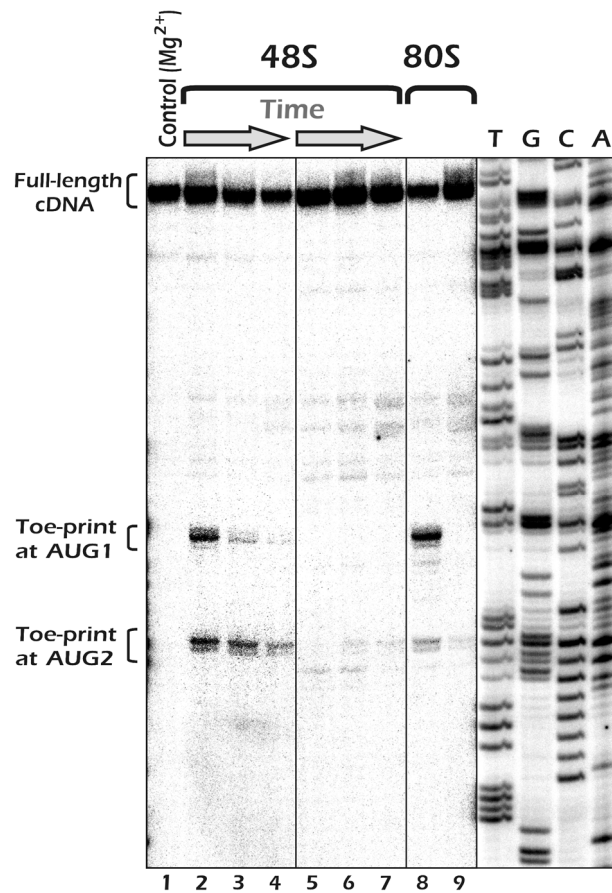

**Figure S6.** Uncapped transcript  $\Delta E12$  is unable to form initiation complexes efficiently.  $m^7G$ -capped (lanes 1-4 and 8) or uncapped (lanes 5-7 and 9) mRNAs were incubated in RRL in the presence of GMPPNP (lanes 1-7) or cycloheximide (lanes 8-9) for different times (lanes 2 and 5 – 20 s, 3 and 6 – 60 s, 4 and 7-9 – 600 s). The reaction was stopped by elevating the  $Mg^{2+}$  concentration. Sequencing lanes obtained with the same primer and the corresponding cDNA are shown on the right.

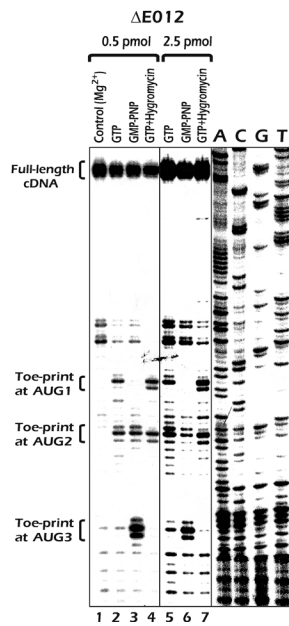

**Figure S7.** Toe-printing analysis of ribosomal complexes assembled in RRL on the  $\Delta E012$  mRNA at different RRL to mRNA ratio. The  $\Delta E012$  mRNA was incubated in RRL with 15 mM  $Mg(OAc)_2$  (lane 1), 2 mM GTP·Mg/GMPPNP·Mg (lanes 2/3 and 5/6), or 2 mM GTP·Mg and 1 mg/ml hygromycin B (lanes 4 and 7). The latter antibiotic arrested translation at the stage of 80S similarly to cycloheximide {Dmitriev, 2003 #96}, and GTP·Mg was added in this case just to be sure that the concentrations of all components except the hygromycin B were the same in the reaction mixtures.

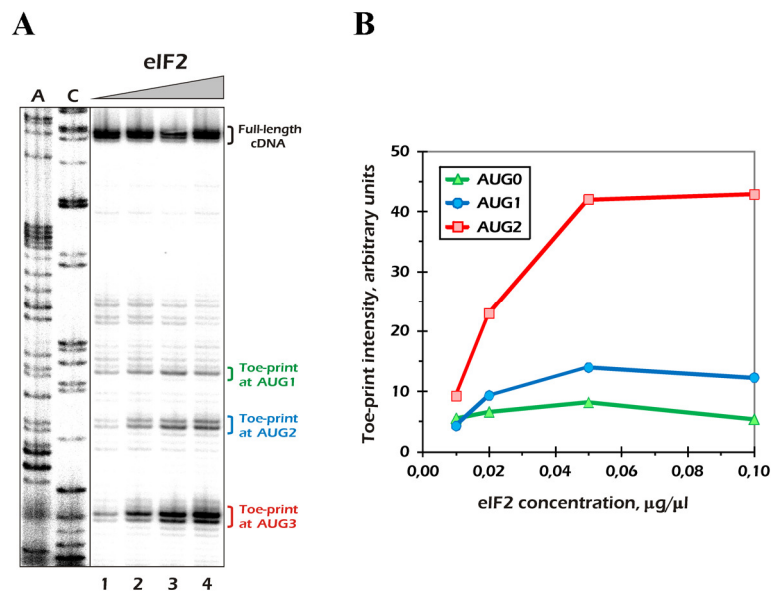

**Figure S8.** Effect of the increasing concentration of eIF2 on ribosomal complexes assembled from purified components on the  $\Delta\text{E012}$  mRNA. **(A)** Sequencing gel with results of the toe-printing assay. The reaction mixtures contained all individual components necessary for the 48S complex reconstitution (40S, Met-tRNA<sub>i</sub>, eIF1, eIF1A, eIF3, eIF4A, eIF4B, eIF4F) and the increasing amounts of eIF2 (lane 1 – 0,01  $\mu\text{g}/\mu\text{l}$ ; 2 – 0,02  $\mu\text{g}/\mu\text{l}$ ; 3 – 0,05  $\mu\text{g}/\mu\text{l}$ ; 4 – 0,1  $\mu\text{g}/\mu\text{l}$ ). The reaction was stopped after 10 min incubation by addition of a high concentration of  $\text{Mg}(\text{OAc})_2$ . **(B)** Quantification of toe-print signals corresponding to the 48S complexes at the three AUG codons. The values were normalized to the overall signal densities in the corresponding lanes.
